# Supplementary material for: Differential expression profile of mRNAs, lncRNAs, and circRNAs reveals potential molecular mechanism in breast cancer
Source: PubMed Central journal article supplement (PMC9338430; doi:10.1042/bsr20220645), 2022-07-29
Supplement: BSR-2022-0645_supp.pdf [file BSR-2022-0645_supp.pdf]

**Supplementary Table 1. Patients' information**

|                  | <b>Year</b> | <b>HR</b> | <b>HER-2</b> | <b>Ki-67(%)</b> | <b>TNM</b> | <b>Grade</b> |
|------------------|-------------|-----------|--------------|-----------------|------------|--------------|
| <b>Patient 1</b> | 39          | -         | -            | 65              | T3N0M0     | III          |
| <b>Patient 2</b> | 70          | -         | +++          | 30              | T1N0M0     | II           |
| <b>Patient 3</b> | 49          | +         | +++          | 70              | T2N3M0     | II           |

**Supplementary Table 2. Summary of RNA sequencing data obtained in the study**

| <b>Sample</b> | <b>Raw Reads</b> | <b>Raw Bases</b> | <b>rRNA</b>        | <b>Clean Reads</b> | <b>Clean Bases</b> | <b>Clean Ratio</b> | <b>Q20</b> | <b>Q30</b> | <b>GC</b> |
|---------------|------------------|------------------|--------------------|--------------------|--------------------|--------------------|------------|------------|-----------|
| C1            | 99613588         | 14761035187      | 771668<br>(0.77%)  | 97934906           | 14507655458        | 99%                | 98%        | 95%        | 42%       |
| CP1           | 111185506        | 16438867314      | 1153060<br>(1.04%) | 108563450          | 16046939359        | 99%                | 98%        | 95%        | 40%       |
| C2            | 120718204        | 17869084800      | 1452853<br>(1.20%) | 116646934          | 17259986125        | 98%                | 97%        | 93%        | 43%       |
| CP2           | 118099104        | 17496802551      | 685611<br>(0.58%)  | 114940884          | 17021730149        | 98%                | 97%        | 93%        | 40%       |
| C3            | 114398138        | 16596876883      | 2660047<br>(2.33%) | 109943816          | 15944408010        | 99%                | 98%        | 94%        | 44%       |
| CP3           | 109640150        | 15730199790      | 815713<br>(0.74%)  | 107220616          | 15371021444        | 99%                | 98%        | 94%        | 40%       |
